# Supplementary material for: Angiotropism and extravascular migratory metastasis in cutaneous and uveal melanoma progression in a zebrafish model
Source: PubMed Central journal article supplement (PMC6041265; doi:10.1038/s41598-018-28515-6), 2018-07-11
Supplement: 41598_2018_28515_MOESM1_ESM.pdf [file 41598_2018_28515_MOESM1_ESM.pdf]

# Angiotropism and Extravascular Migratory Metastasis in Cutaneous and Uveal Melanoma Progression in a Zebrafish Model

Giulia Fornabaio<sup>1,2,3</sup>, Raymond L. Barnhill<sup>4,5</sup>, Claire Lugassy<sup>2</sup>, Laurent A. Bentolila<sup>6,7</sup>, Nathalie Cassoux<sup>5,8</sup>, Sergio Roman-Roman<sup>2</sup>, Samar Alsafadi<sup>2,\*</sup>, Filippo Del Bene<sup>1,2,\*</sup>

\* Correspondence to: samar.alsafadi@curie.fr, filippo.del-bene@curie.fr

<sup>1</sup>Institut Curie, PSL Research University, Inserm U934, CNRS UMR315 F-75005, Paris, France

<sup>2</sup>Institut Curie, PSL Research University, Department of Translational Research, F-75005, Paris, France

<sup>3</sup>Sorbonne Universités, UPMC University Paris 6, CNRS UMR 3215, INSERM U934, F-75005, Paris, France

<sup>4</sup>Institut Curie, PSL Research University, Department of Pathology, F-75005, Paris, France

<sup>5</sup>Faculty of Medicine, University of Paris René Descartes, F-75006 Paris, France

<sup>6</sup>California NanoSystems Institute, Los Angeles, CA, 90095, USA

<sup>7</sup>Department of Chemistry and Biochemistry, University of California, Los Angeles, CA, 90095, USA

<sup>8</sup>Institut Curie, PSL Research University, Department of Ophthalmology, F-75005, Paris, France.

## **Supplementary material legends**

**Supplementary Video S1. Video showing EVMM of C8161-GFP cutaneous melanoma cells co-cultured with HUVEC endothelial cells** (24 hour video, 20x dry objective, acquisition time: 15 minutes).

**Supplementary Video S2. Video showing EVMM of OMM 2.3-GFP uveal melanoma cells co-cultured with HUVEC endothelial cells** (24 hour video, 20x dry objective, acquisition time: 15 minutes).

**Supplementary Video S3. Video showing EVMM of OMM 2.5-GFP uveal melanoma cells co-cultured with HUVEC endothelial cells** (24 hour video, 20x dry objective, acquisition time: 15 minutes).

**Supplementary Image S4. Other examples of angiotropic cutaneous melanoma cells cuffing the vessels of zebrafish embryos.** (A) A 30 hpi embryo, imaged with a 25x oil objective, using a Zeiss LSM 700 confocal microscope. (B) A 30 hpi embryo, imaged with a 40x water objective, using a Zeiss LSM 700 confocal microscope. (C) and (D) 4 dpi embryos, imaged with a 63x water objective, using a Zeiss LSM 880 confocal microscope. (A), (B), (C) and (D) white bar= 20  $\mu$ m, white arrows= angiotropic cells, green= melanoma cells, red= zebrafish blood vessels.

**Supplementary Video S5. Video showing an angiotropic cutaneous melanoma cell cuffing a vessel** (25x oil objective, 25 minute acquisition, 10 hour video, 30 hpi embryo).

**Supplementary Video S6. A zoomed-in video of angiotropic cell of Supplement S5.**

**Supplementary Video S7. 3D reconstruction of the video in Supplement S6** (obtained using the software Bitplane-Imaris).

**Supplementary Video S8. Video showing angiotropic uveal melanoma cells attached to the external surface of vessels** (40x water objective, 20 minute acquisition, 8 hour video, 30 hpi embryo).

**Supplementary Video S9. A zoomed-in video of angiotropic cells of Supplement S8.**

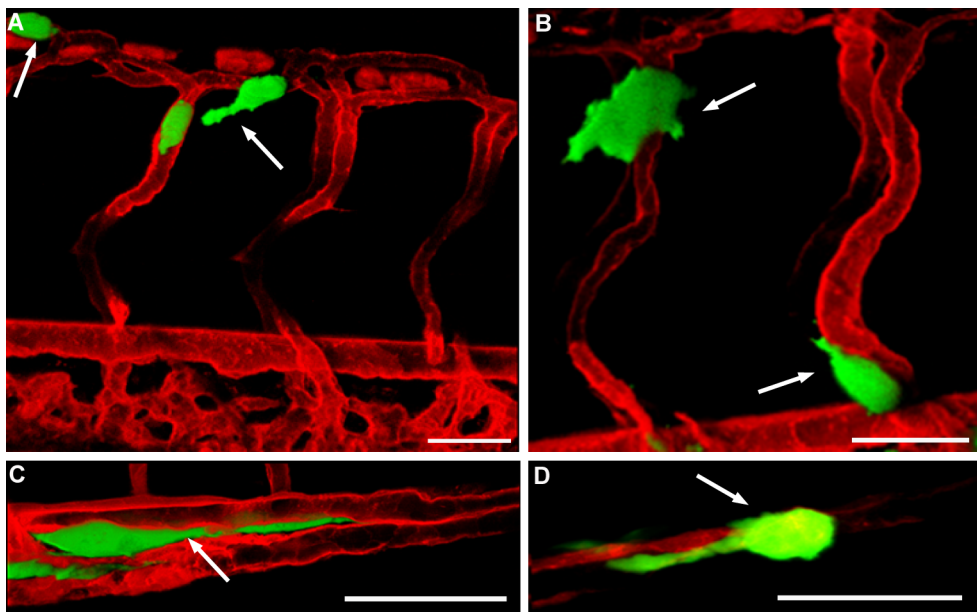

Supplementary figure S4
